# Supplementary material for: Transcription factor c-Maf is a checkpoint that programs macrophages in lung cancer
Source: JCI journal article supplement (doi:10.1172/jci131335), 2020-01-16
Supplement: sd1 [file 1]

## **Supplemental Materials**

### **Inventory**

1. Table S1
2. Table S2
3. Supplemental Figures 1-8

**Table S1. Clinicopathological Features of Human NSCLC Patients**

| Patients and tumor characteristics | Value                                   |
|------------------------------------|-----------------------------------------|
|                                    | Mean $\pm$ SD (range) or No (%)<br>N=16 |
| Age (year)                         | 61.25 $\pm$ 8.25                        |
| Gender                             |                                         |
| Male                               | 6 (37.5%)                               |
| Female                             | 10 (62.5%)                              |
| Histology                          |                                         |
| Adenocarcinoma                     | 10 (62.5%)                              |
| Squamous cell carcinoma            | 6 (37.5%)                               |
| TNM stage                          |                                         |
| I                                  | 11 (68.75%)                             |
| II                                 | 3 (18.75%)                              |
| III                                | 2 (12.5%)                               |
| IV                                 | 0                                       |
| T- factor                          |                                         |
| T1                                 | 6 (37.5%)                               |
| T2                                 | 9 (56.25%)                              |
| T3                                 | 1 (6.25%)                               |
| T4                                 | 0                                       |
| N- factor                          |                                         |
| N0                                 | 13 (81.25%)                             |
| N1/2                               | 3 (18.75%)                              |
| Smoking status                     |                                         |
| Non-smoker                         | 3 (18.75%)                              |
| Smoker                             | 13 (81.25%)                             |

**Table S2. Primer sequences for qRT-PCR and ChIP-qPCR**

| Gene               | Primers |                              |
|--------------------|---------|------------------------------|
| mc-Maf             | Forward | 5'-AGCAGTTGGTGACCATGTTCG-3'  |
|                    | Reverse | 5'-TGGAGATCTCCTGCTTGAGG-3'   |
| mCSF-1R<br>CNS+3   | Forward | CAGCAATGTGTTTCCGCCC          |
|                    | Reverse | TCAAACCCCCTGTCAGGTCT         |
| mCSF-1R<br>CNS-5   | Forward | TGAGAAGCGAGAGCCCTAAGT        |
|                    | Reverse | CACCAGATTGTCCACCTCCAC        |
| mCSF-1R<br>CNS+0.6 | Forward | CCTAGGCTTTGACTCACGGT         |
|                    | Reverse | ACTCCCAGGTAACACCCCAA         |
| mCSF-1R<br>CNS+0.7 | Forward | CTGGGGACAAGGGGACATAC         |
|                    | Reverse | TCGAGTTGAGTTGACTGGCA         |
| mIL-10             | Forward | 5'-AGTGGAGCAGGTGAAGAGTG-3'   |
|                    | Reverse | 5'-TTCGGAGAGAGGTACAAACG-3'   |
| mArginase-1        | Forward | 5'-TTTTAGGGTTACGGCCGGTG-3'   |
|                    | Reverse | 5'-CCTCGAGGCTGTCTTTTGA-3'    |
| mIL-1 $\beta$      | Forward | 5'-GCCACCTTTTGACAGTGATGAG-3' |
|                    | Reverse | 5'-GACAGCCCAGGTCAAAGGTT-3'   |
| mIL-6              | Forward | 5'-AAGACAAAGCCAGAGTCCTTCA-3' |
|                    | Reverse | 5'-AGAGCATTGGAAATTGGGGT-3'   |
| mTNF- $\alpha$     | Forward | 5'-TGTAGCCCACGTCGTAGCAAA-3'  |
|                    | Reverse | 5'-GCTGGCACCCTAGTTGGTTGT-3'  |
| miNOS              | Forward | 5'-GGTGAAGGGACTGAGCTGTTA-3'  |
|                    | Reverse | 5'-CAACGTTCTCCGTTCTCTTGC-3'  |
| mIL-12p35          | Forward | 5'-CTCCTAAACCACCTCAGTTTGG-3' |
|                    | Reverse | 5'-CATGATCGATGTCTTCAGCAGT-3' |
| m $\beta$ -MG      | Forward | 5'-CTTTCTGGTGCTTGTCTC-3'     |
|                    | Reverse | 5'-TCAGTATGTTCCGGCTTCC-3'    |
| mVEGF              | Forward | 5'-TTACTGCTGTACCTCCACC-3'    |
|                    | Reverse | 5'-ACAGGACGGCTTGAAGATG-3'    |

|                 |         |                                             |
|-----------------|---------|---------------------------------------------|
| mIRF4           | Forward | 5'-CCATTGAGCCAAGCATAAAGG-3'                 |
|                 | Reverse | 5'-CTCGTCGTGGTCAGCTCTTT-3'                  |
| mIRF5           | Forward | 5'-AATACCCCACCACCTTTTGA-3'                  |
|                 | Reverse | 5'-TTGAGATCCGGGTTTGAGAT-3'                  |
| mIRF8           | Forward | 5'-CTACTGCACAGCAACCGCAA-3'                  |
|                 | Reverse | 5'-ACCACCCTGCTGTCAGGTA-3'                   |
| mTGF- $\beta$ 1 | Forward | 5'-TGCTAATGGTGGACCGCAA-3'                   |
|                 | Reverse | 5'-CACTGCTTCCCGAATGTCTGA-3'                 |
| mCCL5           | Forward | 5'-CAATCTTGCAGTCGTGTTTG-3'                  |
|                 | Reverse | 5'-GGAGTGGGAGTAGGGGATTA-3'                  |
| mCCR2           | Forward | 5'-GGAGAAAAGCCAACCTCCTTC-3'                 |
|                 | Reverse | 5'-AGGCAGTTGCAAAGGTACTG-3'                  |
| hB2M            | Forward | 5'-TCTTTCAGCAAGGACTGGTCT-3'                 |
|                 | Reverse | 5'-ACATGTCTCGATCCCCTTAAC-3'                 |
| hc-Maf          | Forward | 5'-CAGCAAGGAGGAGGTGATCC-3'                  |
|                 | Reverse | 5'-GGTTCCTTCTCCGACTCCAGG-3'                 |
| hIL-10          | Forward | 5'-CCCCTTCCCAGGCAACCTGC-3'                  |
|                 | Reverse | 5'-CCCAGGGAGTTCACATGCGCC-3'                 |
| hIL-12p35       |         | Hs-IL12A-1-SG (Qiagen, Cat.no.: QT00000357) |
| hIL-23p19       | Forward | 5'-GCTTCATGCCTCCCTACTGG-3'                  |
|                 | Reverse | 5'-TTGAAGCGGAGAAGGAGACG-3'                  |
| hTNF- $\alpha$  | Forward | 5'-ACCCACGGCTCCACCCTCTC-3'                  |
|                 | Reverse | 5'-CCCTCTGGGGGCCGATCACT-3'                  |
| hIL-6           | Forward | 5'-TCCCCTCCAGGAGCCCAGCTA-3'                 |
|                 | Reverse | 5'-CAGGGCTGAGATGCCGTCGAG-3'                 |



## Supplemental Figure 1

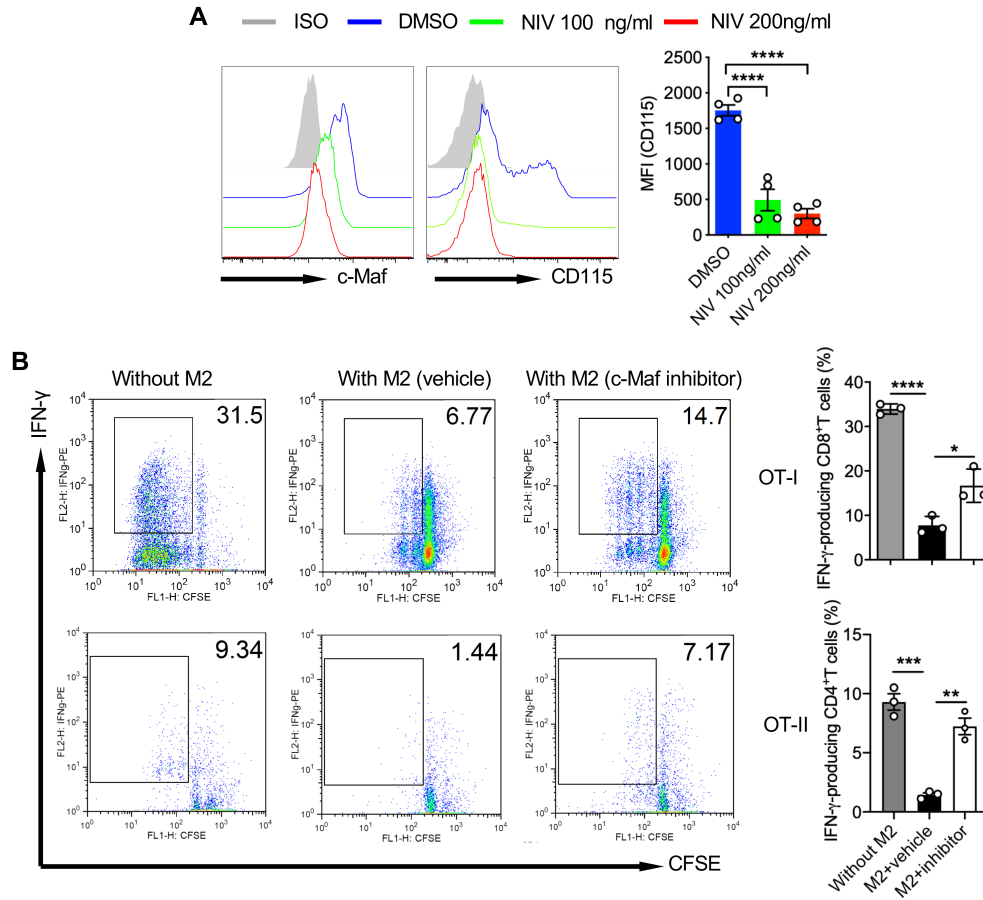

**Figure S1. c-Maf inhibition abrogates CD115 expression and reduces M2 BMM-mediated T cell suppression.** (A) M2 BMM were treated with c-Maf inhibitor or vehicle and c-Maf and CD115 expression levels were detected by flow cytometry. Representative histograms and summarized expression levels are shown. MFI: mean fluorescent intensity. Representative of at least three experiments. Data are shown as mean  $\pm$  SEM. \*\*\*\* $P$  < 0.0001, by one-way ANOVA analysis with Dunnett's multiple comparisons test. (B) Splenocytes from OT-I or OT-II mice were labeled with CFSE and then co-cultured with polarized M2 BMM in the presence of c-Maf inhibitor or vehicle control for 3 days. Cells without M2 BMM were used as control. Representative dot plots and summarized IFN- $\gamma$ -producing CD4 and CD8 T cells are shown. Data are representative of at least two independent experiments with similar results. Data are shown as mean  $\pm$  SD (n=3). \* $P$  < 0.05, \*\* $P$  < 0.01, \*\*\* $P$  < 0.001, \*\*\*\* $P$  < 0.0001 by one-way ANOVA with *post hoc t* test and Bonferroni's correction.

## Supplemental Figure 2

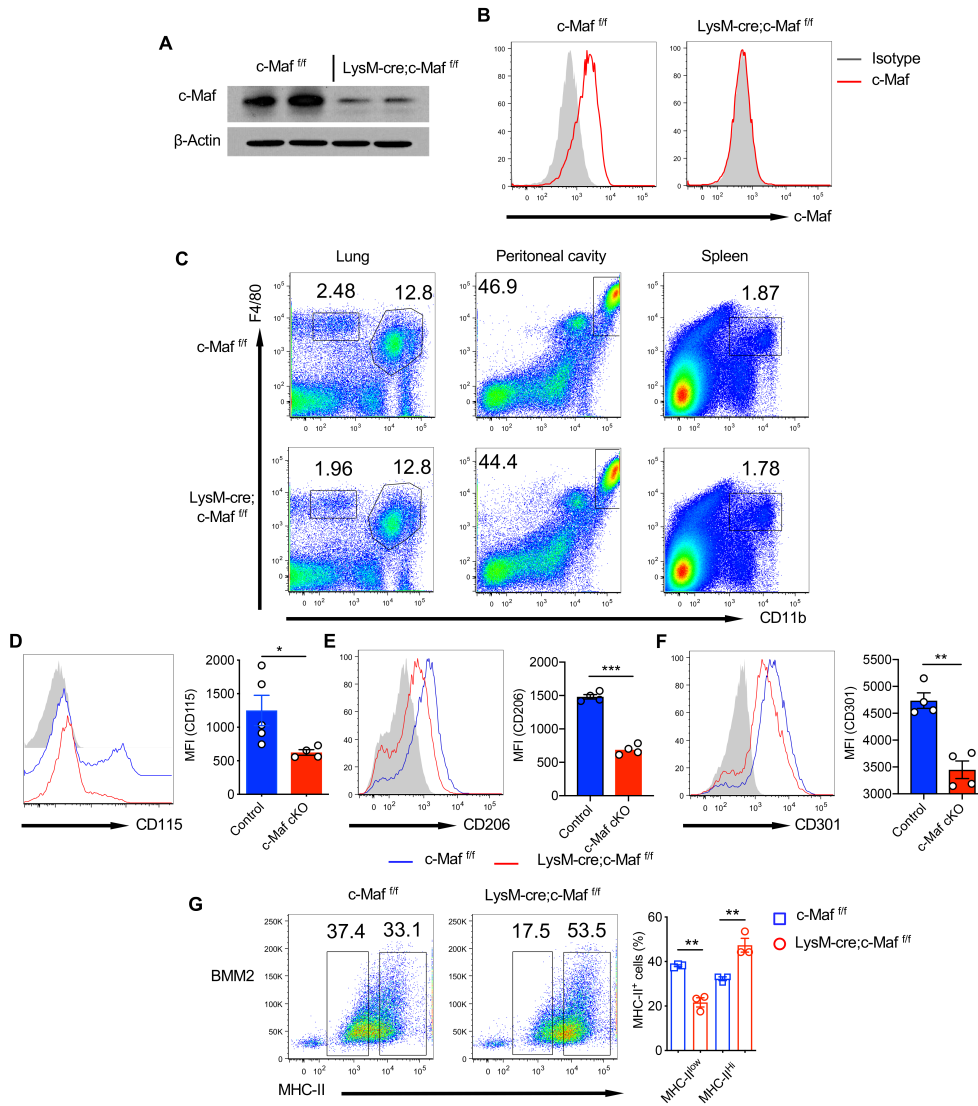

**Figure S2. Conditional deletion of c-Maf in M2 macrophages leads to decreased CD115, CD206, and CD301 expression.** (A, B) Polarized M2 BMM from c-Maf  $^{fl/fl}$  control mice and LysM-cre;c-Maf  $^{fl/fl}$  mice were lysed and c-Maf expression was determined by WB analysis (A) or intracellular flow analysis (B). (C) Single cell suspensions from lung, peritoneal cavity, and spleen were stained with CD11b and F4/80. Cells were gated on viable cells. (D, E, F, G). Polarized M2 BMM from c-Maf  $^{fl/fl}$  control mice and LysM-cre;c-Maf  $^{fl/fl}$  mice were stained for CD115 (D), CD206 (E), CD301 (F), and MHC II (G). Representative histograms or dot plots and summarized data are shown. Data are shown as mean  $\pm$  SEM. \* $P < 0.05$ , \*\* $P < 0.01$ , \*\*\* $P < 0.001$ , by two-tailed, unpaired  $t$  test.

### Supplemental Figure 3

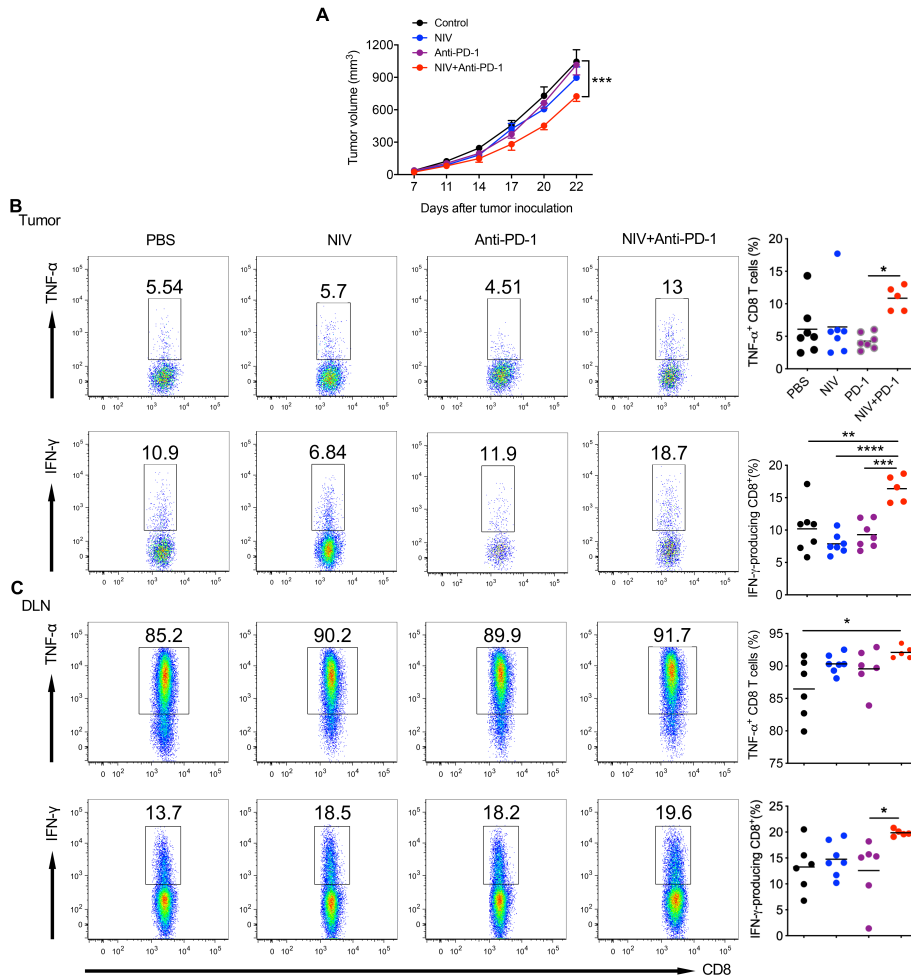

**Figure S3. Inhibition of c-Maf promotes anti-PD-1 therapeutic efficacy in LLC s.c model.** (A) LLC-bearing mice were treated with c-Maf inhibitor Nivalenol (NIV) with or without anti-PD-1. Tumor growth curve is shown.  $***P < 0.001$  by mixed-effects two-way ANOVA with Sidak's multiple comparisons test. (B, C) Single cell suspensions from tumor and draining lymph node (DLN) were stimulated with PMA+ionomycin. Cells were stained for CD8 and intracellular TNF- $\alpha$  and IFN- $\gamma$  production. Representative dot plots and summarized percentages of TNF- $\alpha$ - and IFN- $\gamma$ -producing CD8<sup>+</sup> T cells are shown. Cells were gated on CD8<sup>+</sup> cells. Data are shown as mean  $\pm$  SEM.  $*P < 0.05$ ,  $**P < 0.01$ ,  $***P < 0.001$ ,  $****P < 0.0001$ , by one-way ANOVA with *post hoc t* test and Bonferroni's correction.

## Supplemental Figure 4

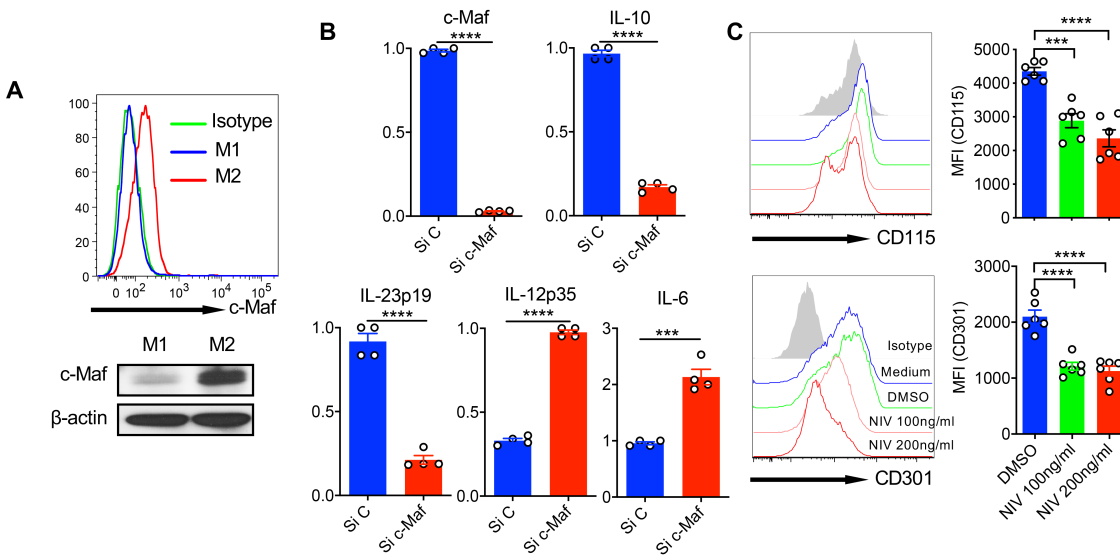

**Figure S4. c-Maf is expressed in human M2 macrophages and regulates M2-related gene expression and CD115 and CD301 expression.** (A) c-Maf expression in polarized human M1-like and M2-like macrophages determined by flow cytometry and WB analysis. Data are representative of at least three independent experiments with similar results. (B) Human M2 macrophages were transfected with c-Maf (Si c-Maf) or control siRNA (Si C) and the specific gene mRNA expression levels were determined by qPCR. \*\*\* $P < 0.001$ , \*\*\*\* $P < 0.0001$ , by two-tailed, unpaired  $t$  test. (C) Human M2 macrophages were treated with c-Maf inhibitor or vehicle control for 24 h and the expression levels of CD115 and CD301 were determined by flow cytometry. Representative histograms and summarized data are shown. Data are shown as mean  $\pm$  SEM. \*\*\* $P < 0.001$ , \*\*\*\* $P < 0.0001$ , by one-way ANOVA with Dunnett's multiple comparisons test.

## Supplemental Figure 5

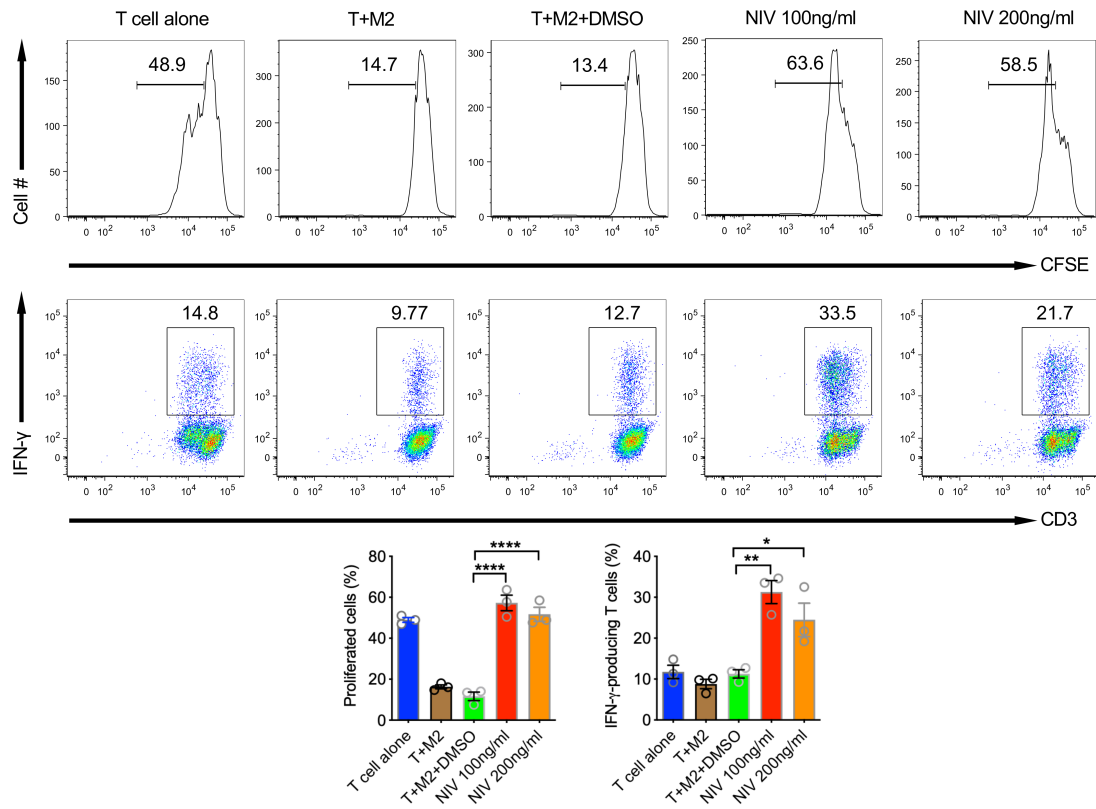

**Figure S5. Inhibition of c-Maf in human M2 macrophages abrogates its immunosuppressive activity.** Human polarized M2 macrophages were co-cultured with CFSE-labeled autologous T cells stimulated with CD3/CD28 beads in the presence of c-Maf inhibitor or vehicle control DMSO for three days. Cell proliferation and intracellular IFN- $\gamma$  production were determined by flow cytometry. Representative histograms, dot plots, and summarized data are shown. Data are shown as mean  $\pm$  SEM. \* $P < 0.05$ , \*\* $P < 0.01$ , \*\*\*\* $P < 0.0001$  by one-way ANOVA with *post hoc t* test and Bonferroni's correction.

## Supplemental Figure 6

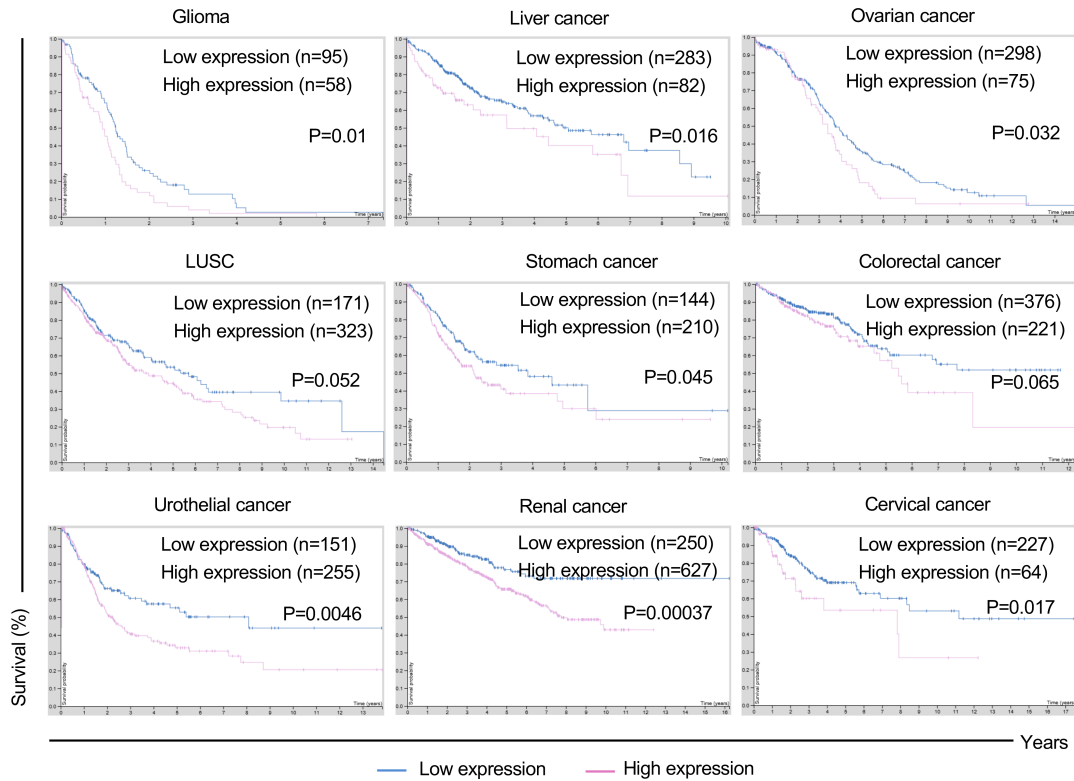

P score: Log-rank P value for Kaplan-Meier plot showing results from analysis of correlation between mRNA expression level and patient survival

**Figure S6. High expression of c-Maf correlates with worse survival in human cancer patients.** Human protein atlas data show that high mRNA expression level of c-Maf is correlated with poor survival of human cancers. Log-rank P value is shown for Kaplan-Meier plots.

# Supplemental Figure 7

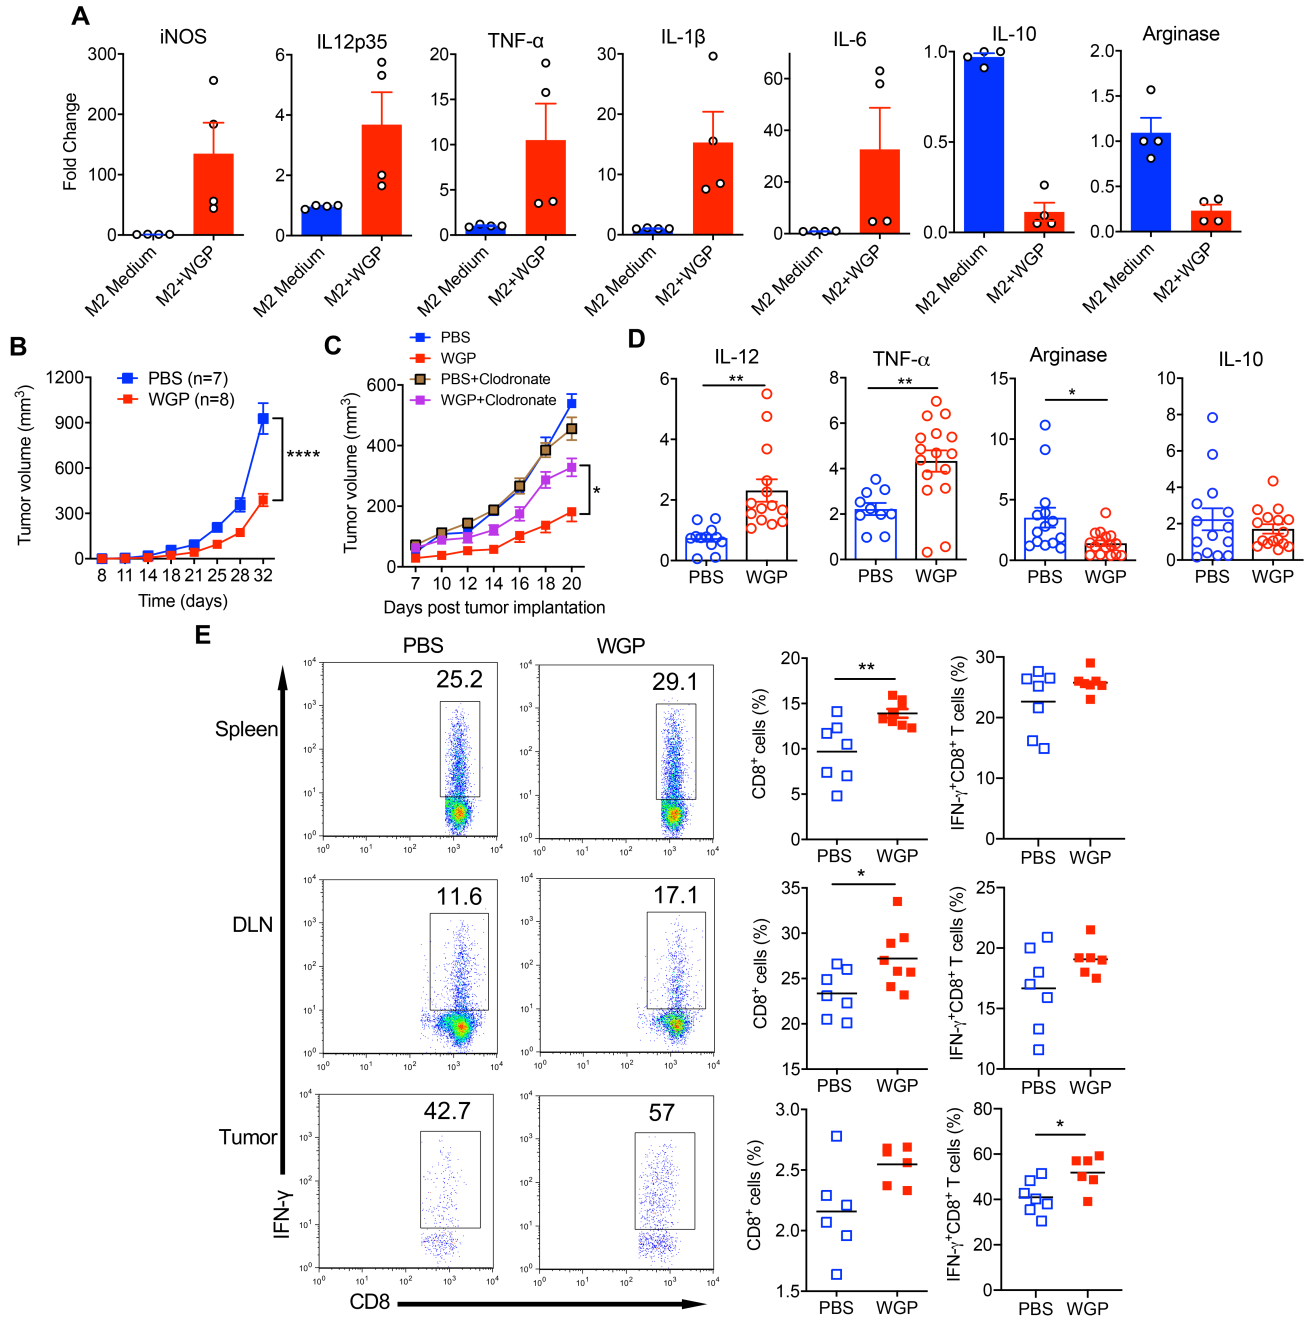

**Figure S7. WGP treatment converts M2 BMM and immunosuppressive TAM into an M1-like phenotype leading to reduced tumor progression with enhanced antitumor T cell response.**

(A) Polarized mouse M2 BMM were treated with WGP  $\beta$ -glucan (150  $\mu$ g/ml) for 24 h and the mRNA expression levels of indicated genes were determined by qPCR analysis. Data are representative of at least three independent experiments. (B) LLC-bearing mice (n=7-8) were treated with or without oral WGP  $\beta$ -glucan daily. Tumor growth curve is shown. \*\*\*\* $P < 0.0001$ , by two-way repeated measures ANOVA with Sidak's multiple comparisons test. (C) Mice (n=6-10) depleted with or without macrophages using Clodronate were injected with LLC cells. Mice were treated with or without oral WGP  $\beta$ -glucan daily when tumors were palpable. Tumor growth was recorded. \* $P < 0.05$ , by two-way repeated measures ANOVA with Sidak's multiple comparisons test. (D) TAM were sorted from WGP  $\beta$ -glucan treated mice or control mice. The mRNA expression levels of indicated genes were determined by qRT-PCR. \* $P < 0.05$ , \*\* $P < 0.01$ , by two-tailed, unpaired  $t$  test. (E) Single cell suspensions from spleen, draining lymph node (DLN), and tumor were stimulated with PMA+ionomycin. Cells were stained for CD8 and intracellular IFN- $\gamma$  production. Representative dot plots are shown. Cells were gated on CD8<sup>+</sup> cells. Summarized frequencies of total CD8 T cells (gated on the total viable cells) and IFN- $\gamma$ -producing CD8<sup>+</sup> T cells are also shown. Data are shown as mean  $\pm$  SEM. \* $P < 0.05$ , \*\* $P < 0.01$ , by two-tailed, unpaired  $t$  test.



## Supplemental Figure 8

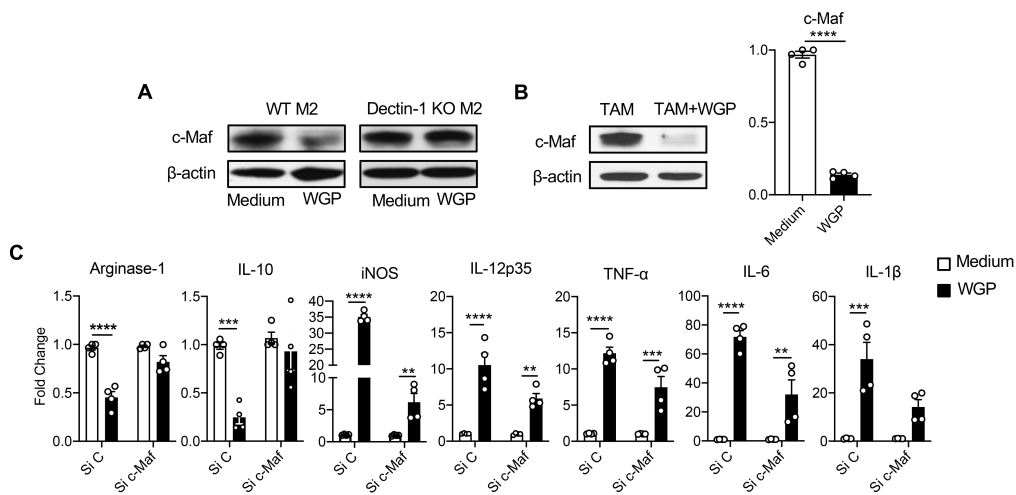

**Figure S8. WGP β-glucan treatment downregulates c-Maf expression in murine M2 BMM and TAM.** (A) M2 BMM from WT or dectin-1 KO mice were treated with WGP β-glucan (150 μg/ml) for 24 h and c-Maf was detected by WB. (B) TAM sorted from LLC-bearing mice were treated with WGP β-glucan for 24 h and c-Maf was determined by WB and qRT-PCR analysis. \*\*\*\* $P < 0.0001$ , by two-tailed, unpaired  $t$  test. (C) M2 BMM transfected with c-Maf (Si c-Maf) or control siRNA (Si C) were stimulated with WGP β-glucan for 6 h and then assayed for the specific gene mRNA expression levels by qRT-PCR. The relative fold increase was calculated using corresponding medium alone (Si-c-Maf or Si C) as baseline. \*\* $P < 0.01$ , \*\*\* $P < 0.001$ , \*\*\*\* $P < 0.0001$ , by two-way ANOVA with Sidak's multiple comparisons test.
